# Supplementary material for: Enhancement of dissipated energy by large bending of an organic single crystal undergoing twinning deformation
Source: Royal Society of Chemistry journal article supplement (doi:10.1039/c8ra02499e), 2018-01-01
Supplement: c8ra02499e1.pdf [file c8ra02499e1.pdf]

## Supporting Information

### Enhancement of Dissipated Energy by Large Bending of an Organic Single Crystal undergoing Twinning Deformation

Sajjad Husain Mir<sup>a</sup>, Yuichi Takasaki<sup>a,b</sup>, Emile R. Engel<sup>a</sup>, Satoshi Takamizawa<sup>a\*</sup>

<sup>a</sup>Department of Materials System Science, Graduate School of Nanobioscience, Yokohama City University, 22-2 Seto, Kanazawa-ku, Yokohama, Kanagawa 236-0027, Japan

<sup>b</sup>Kanagawa Institute of Industrial Science and Technology, Shimoimaizumi, 705-1 Ebina, Kanagawa, 243-0435, Japan

\*E-mail: staka@yokohama-cu.ac.jp

### Table of contents

|                                                              |       |
|--------------------------------------------------------------|-------|
| (a) Experimental information                                 | S2    |
| (b) Crystallographic data                                    | S3    |
| (c) Crystal face indexing                                    | S4    |
| (d) Detail information for observation of stress-strain test | S4    |
| (e) Enlarged color figures described in the main text        | S5-S6 |

### Other supplementary material

Video file for bending action of **1** observed under a polarizing microscope:

(a) Stress-Strain test at 298 K: Takamizawa\_movS1.qt

## Materials

2-methyl-5-nitrobenzoic acid was purchased from Tokyo Chemical Industry, Japan. Solvents were purchased from Wako and used as received.

## Recrystallization

Crystals of **1** were grown in acetone solution by slow evaporation. A mixture of small and long needle-shaped crystals was obtained.

### (a) Experimental information

#### i) Stress-strain test

Stress tests were carried out on a universal testing machine (Tensilon RTG-1210, A&D Co. Ltd.).

#### ii) Single-crystal X-ray diffraction experiment

Single-crystal X-ray analysis of **1** was performed at 298 K on a Bruker SMART APEX CCD area detector (graphite-monochromated Mo-K $\alpha$  radiation ( $\lambda = 0.71073 \text{ \AA}$ )) with a nitrogen flow temperature controller. Empirical absorption corrections were applied using the SADABS program. The structure was solved by direct methods (SHELXS-97) and refined by full-matrix least squares calculations on  $F^2$  (SHELXL-97) using the SHELX-TL program package. Non-hydrogen atoms were refined anisotropically; hydrogen atoms were refined in a riding model. The crystal face indexing was carried out using SMART in a SHELXTL Ver.6.12 program package with a twin resolution program. Crystallographic data of the structure is summarized in Tab. S1.

(b) Crystallographic data

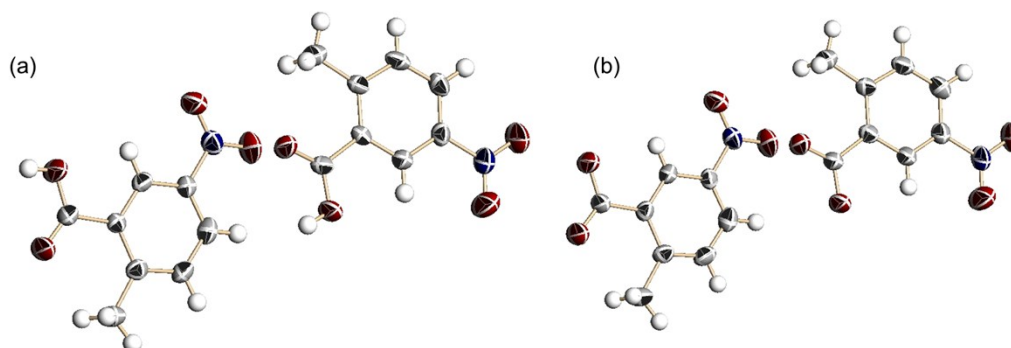

**Figure S1.** Molecular structures of **1** in (a) mother domain and (b) twinned domain as ORTEP representations drawn at 50% probability level for the ellipsoid obtained from single crystal X-ray diffraction measurement at 298 K.

**Table S1.** Crystallographic data of **1** in bent shape.

| Domain                                       | mother ( $\alpha_0$ )                         | daughter ( $\alpha_1$ )                       |
|----------------------------------------------|-----------------------------------------------|-----------------------------------------------|
| T /K                                         | 298                                           | 298                                           |
| Empirical formula                            | C <sub>8</sub> H <sub>7</sub> NO <sub>4</sub> | C <sub>8</sub> H <sub>7</sub> NO <sub>4</sub> |
| M                                            | 181.15                                        | 181.15                                        |
| Crystal system                               | Triclinic                                     | Triclinic                                     |
| Space group                                  | <i>P</i> -1                                   | <i>P</i> -1                                   |
| a /Å                                         | 7.611 (15)                                    | 7.636 (13)                                    |
| b /Å                                         | 10.47 (2)                                     | 10.426 (19)                                   |
| c /Å                                         | 10.55 (2)                                     | 10.520 (18)                                   |
| $\alpha$ /°                                  | 89.45 (3)                                     | 89.28 (3)                                     |
| $\beta$ /°                                   | 81.45 (3)                                     | 81.80 (3)                                     |
| $\gamma$ /°                                  | 76.75 (3)                                     | 76.32 (3)                                     |
| V /Å <sup>3</sup>                            | 810 (3)                                       | 805 (2)                                       |
| Z                                            | 4                                             | 4                                             |
| $D_{\text{calc}}/\text{Mg m}^{-3}$           | 1.485                                         | 1.495                                         |
| $\mu(\text{Mo K}\alpha) \text{ mm}^{-1}$     | 0.121                                         | 0.122                                         |
| Reflections collected                        | 2759                                          | 2769                                          |
| Independent reflections ( $R_{\text{int}}$ ) | 1674                                          | 1554                                          |
| Goodness of fit                              | 1.071                                         | 1.161                                         |
| $R_1(I > 2\sigma)$ (all data)                | 0.0601                                        | 0.1016                                        |
| $wR_2(I > 2\sigma)$ (all data)               | 0.1786                                        | 0.3546                                        |
| Leastdiff.peak (hole) /eÅ <sup>3</sup>       | 0.233(-0.243)                                 | 0.466(-0.431)                                 |

(c) Crystal phase indexing

The crystal face indexing showed deformation twinning of **1**. Shear stress formed daughter domain  $\alpha_1$  from  $\alpha_0$  in rotational twinning. The twinning interfaces are  $(-21-1)_{\alpha_0} // (-21-1)_{\alpha_1}$  (or  $(-21-1)_{\alpha_0} // (-21-1)_{\alpha_1}$ ).

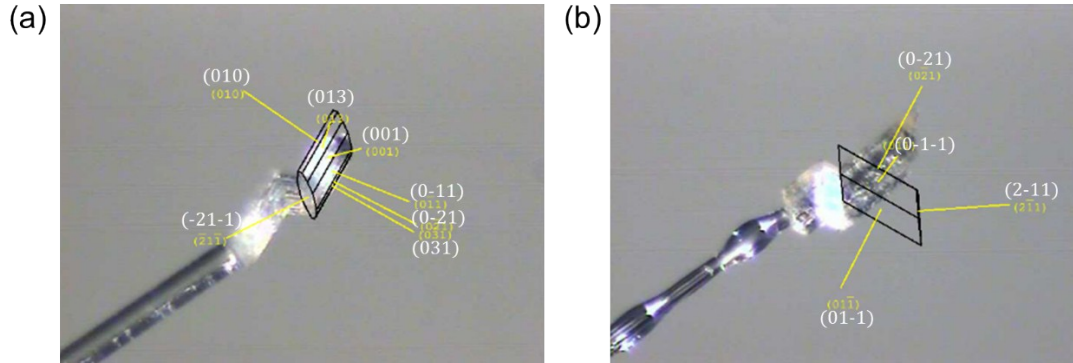

**Figure S2.** a) Crystal face indices of  $\alpha_0$  domain (a) and  $\alpha_1$  domain (b).

(d) Detail information for observation of stress-strain test

**Table S2:** Conditions of cyclic shear test on crystal **1**, shown in Fig. 3b

| Temperature / °C | Loading surface | Crystal dimension     |                           | Displacement Velocity / $\mu\text{m min}^{-1}$ |
|------------------|-----------------|-----------------------|---------------------------|------------------------------------------------|
|                  |                 | width / $\mu\text{m}$ | Thickness / $\mu\text{m}$ |                                                |
| 25               | -1-10           | 32.48                 | 286.96                    | 30                                             |

(e) Enlarged color figures described in the main text

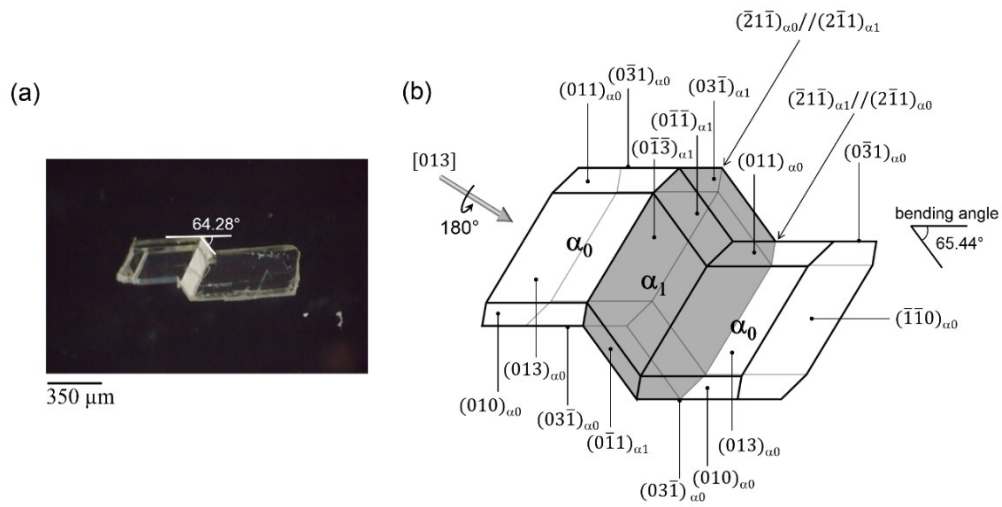

**Figure S3.** a) Optical image of the twinned crystal by compression on crystal surface  $(110)\alpha_0$ ,  $[013]$  and b) crystal face indices of the mechanically twinned crystal.

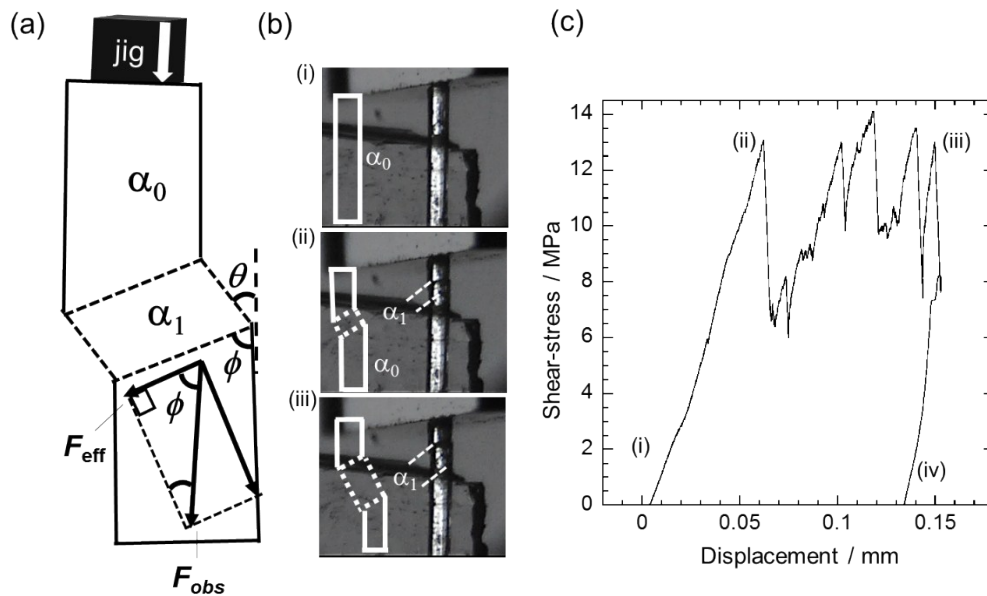

**Figure S4.** Measurement of stress-strain curve, a) Cartoon illustration of crystal deformation pattern and force components, b) snapshots of the twinning deformation of shear-stress (i-iii) (Movie S1) with inset sketches of the deformation pattern, and c) stress-strain curve at 298 K

Effective stress:  $\sigma_{\text{eff}}$

$$F_{\text{eff}} = F_{\text{obs}} \cos\phi \quad (\phi = 57.28^\circ)$$

$$\sigma_{\text{eff}} = F_{\text{eff}} / \text{cross-sectional area}$$

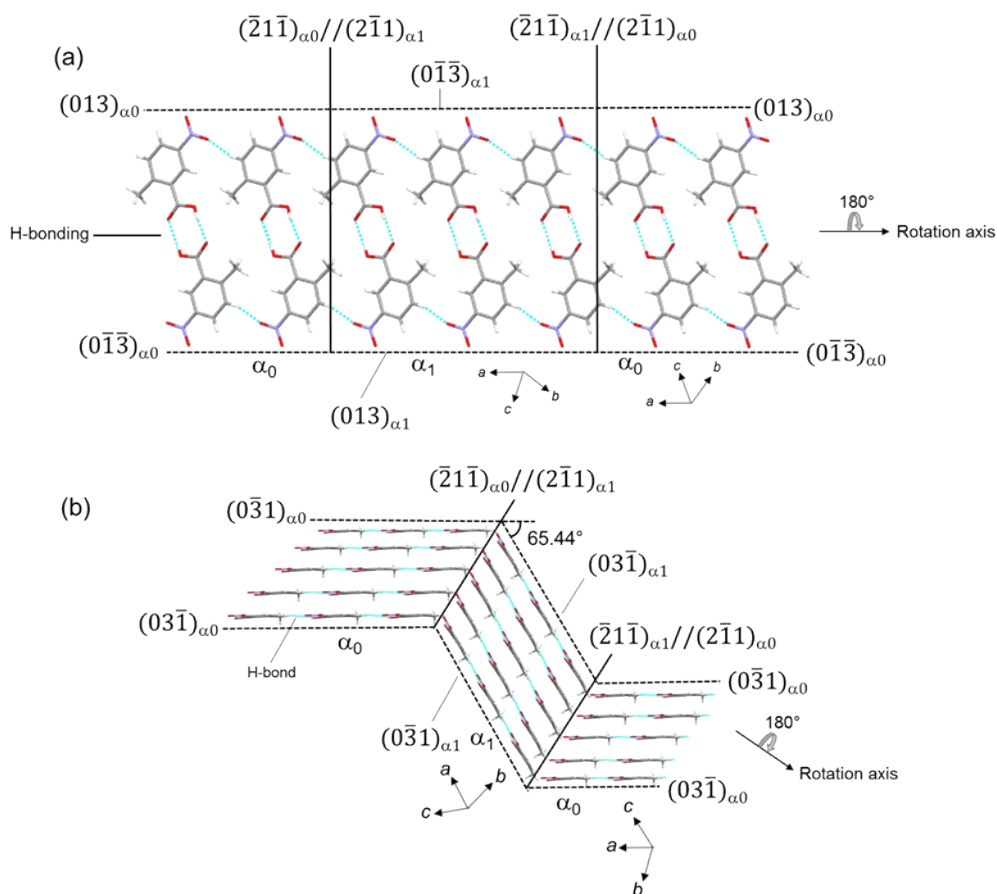

**Figure S5.** Partial packing diagrams of overlapping mother ( $\alpha_0$ ) and daughter domain ( $\alpha_1$ ) of **1** viewed (a) along  $[013]_{\alpha_0}$  and (b) along  $[0\bar{3}1]_{\alpha_0}$ . Molecules form 2D molecular chains by hydrogen bonding (indicated as dotted lines).
